# Supplementary material
Source: PubMed Central journal article supplement (PMC6310104)
Supplement: NIHMS981541-supplement-Supp_figS1-5.pdf [file NIHMS981541-supplement-Supp_figS1-5.pdf]

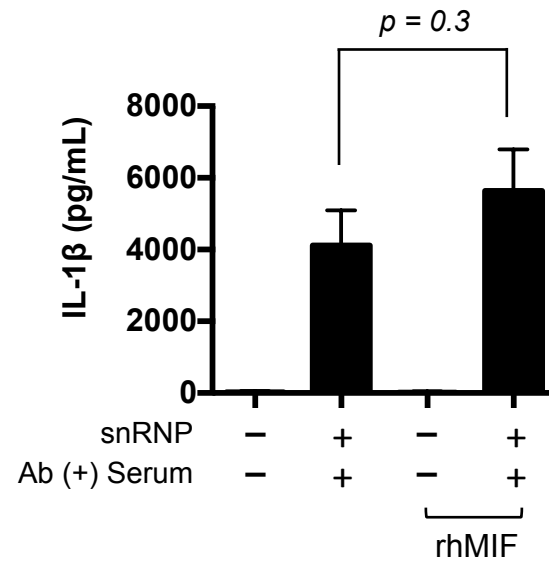

**Supplementary Figure 1.** The effect of recombinant human MIF on the production of IL-1 $\beta$  from monocytes stimulated with U1-snRNP immune complex. IL-1 $\beta$  ELISA at 18 hours from cell culture supernatants of human monocytes incubated for 18 hours with U1-snRNP (snRNP, 5  $\mu$ g/ml) and anti-U1-snRNP antibody-positive (Ab<sup>+</sup>) serum (5% final concentration) in the presence or absence of recombinant MIF (rhMIF, 40  $\mu$ g/ml). Bars and errors bars indicate mean and SEM, respectively (n = 7). The *P*-value was obtained by the paired *t*-test.

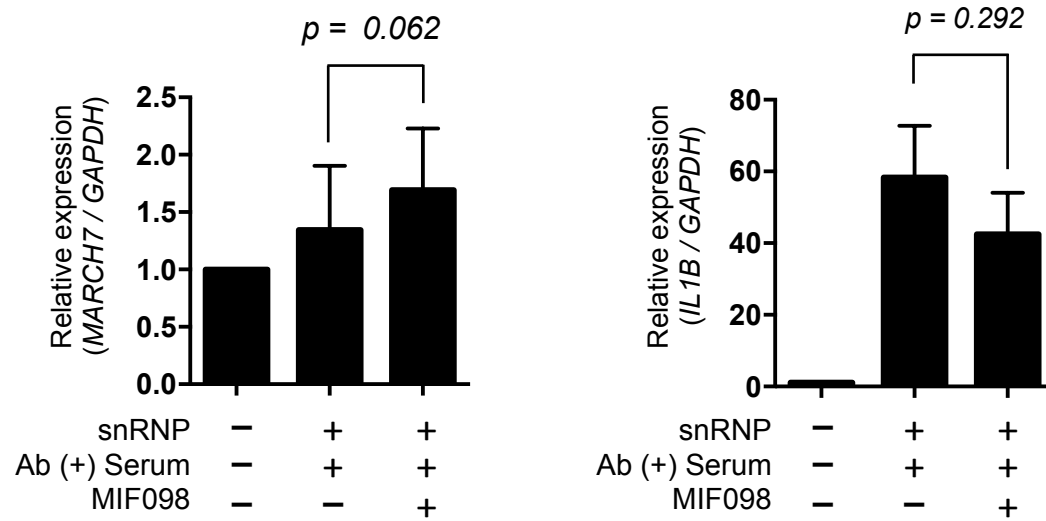

**Supplementary Figure 2.** qPCR analysis of *MARCH7* and *IL1B* genes in human monocytes that were incubated for 5 hours with or without U1-snRNP (snRNP, 5  $\mu$ g/ml) and anti-U1-snRNP antibody-positive (Ab<sup>+</sup>) serum (5% final concentration) in the presence or absence of MIF antagonist MIF098. Bars and error bars indicate mean  $\pm$  SEM (n = 4-6). The *P*-value was obtained by the paired *t*-test.

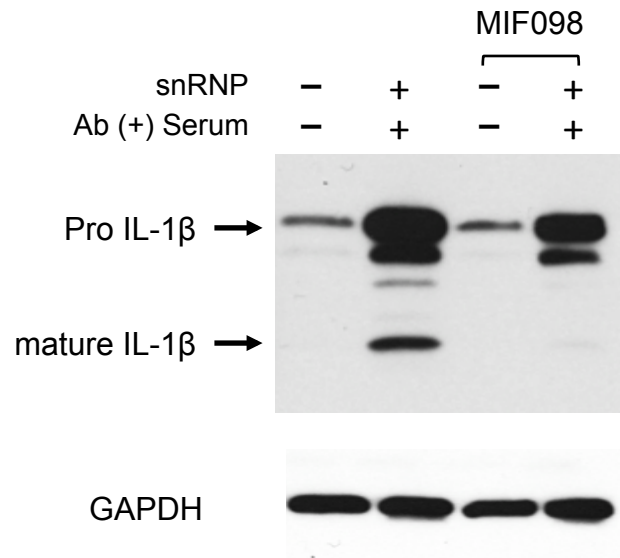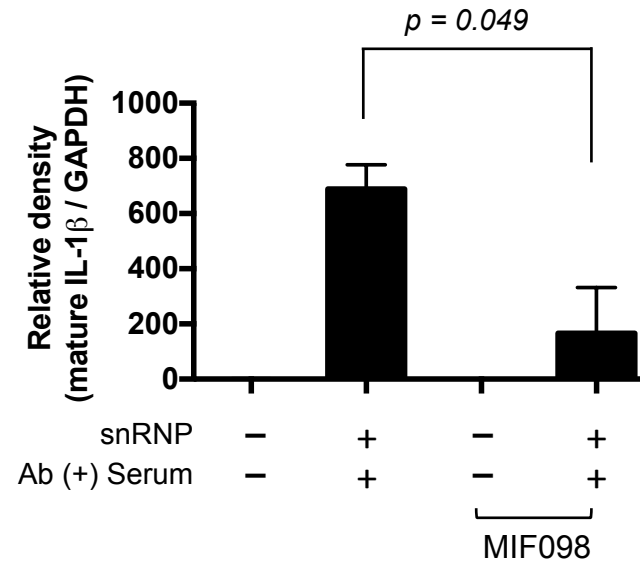

**Supplementary Figure 3.** Western blot analysis of IL-1 $\beta$  in human monocytes that were incubated for 7 hours with U1-snRNP (snRNP, 5  $\mu$ g/ml) and anti-U1-snRNP antibody-positive (Ab+) serum (5% final concentration) in the presence or absence of the MIF antagonist MIF098 (20  $\mu$ M). (A) Representative data from 3 independent experiments with 3 donors. (B) Relative density of mature IL-1 $\beta$ . Bars and error bars indicate mean  $\pm$  and SEM, respectively (n = 3). The P-values were obtained by the paired t-test.

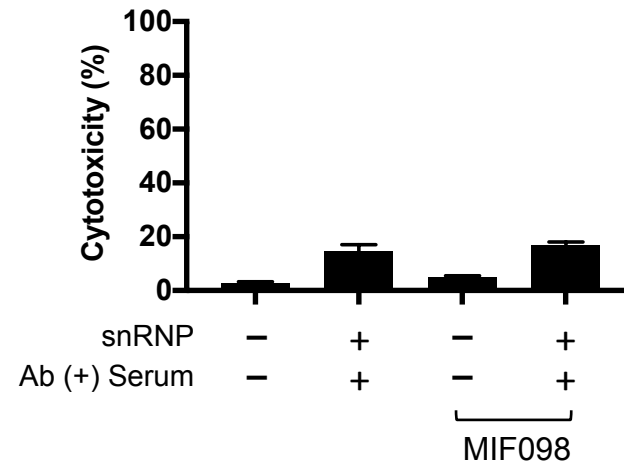

**Supplementary Figure 4.** Pyroptosis occurred at modest levels in human monocytes incubated with U1-snRNP immune complex in the presence or absence of MIF 098. LDH-based cytotoxicity assay was performed on the culture supernatants of monocytes incubated for 18 hours with U1-snRNP (snRNP, 5  $\mu\text{g}/\text{ml}$ ) and anti-U1-snRNP antibody-positive ( $\text{Ab}^+$ ) serum (5% final concentration) in the presence or absence of the MIF antagonist MIF098 (20  $\mu\text{M}$ ). Bars and error bars indicate mean  $\pm$  and SEM, respectively (n = 6).

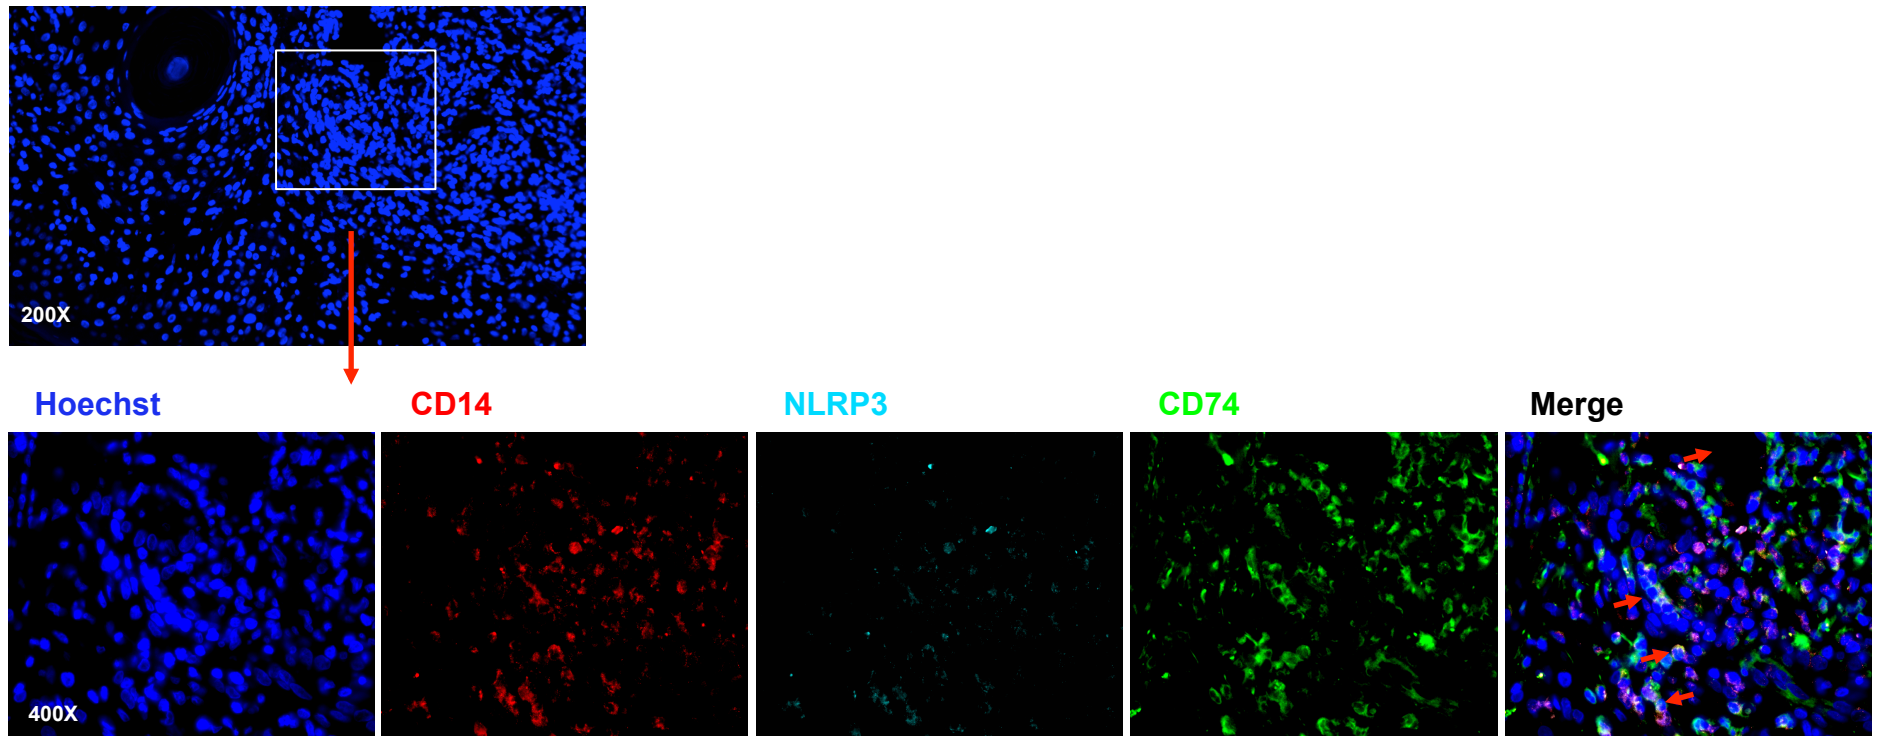

**Supplementary Figure 5.** Immunofluorescent staining of human acute cutaneous lupus lesion with antibodies to CD14 (red), NLRP3 (cyan) and CD74 (green). All nuclei were counterstained with Hoechst 33342. The upper Panel shows nucleus staining (original magnification, x200). The lower panels show fluorescent images for CD14, NLRP3, CD74 staining in the areas indicated by rectangles in the upper panels (original magnification, x400). Arrows indicate triple-stained cells for CD14, NLRP3 and CD74.
